# Supplementary material for: MicroRNA‐93 Regulates Hypoxia‐Induced Autophagy by Targeting ULK1
Source: Hindawi journal article supplement (doi:10.1155/2017/2709053), 2017-01-01

**Supplemental Fig1. Transfection efficiency detection of MEFs and CHO cells**

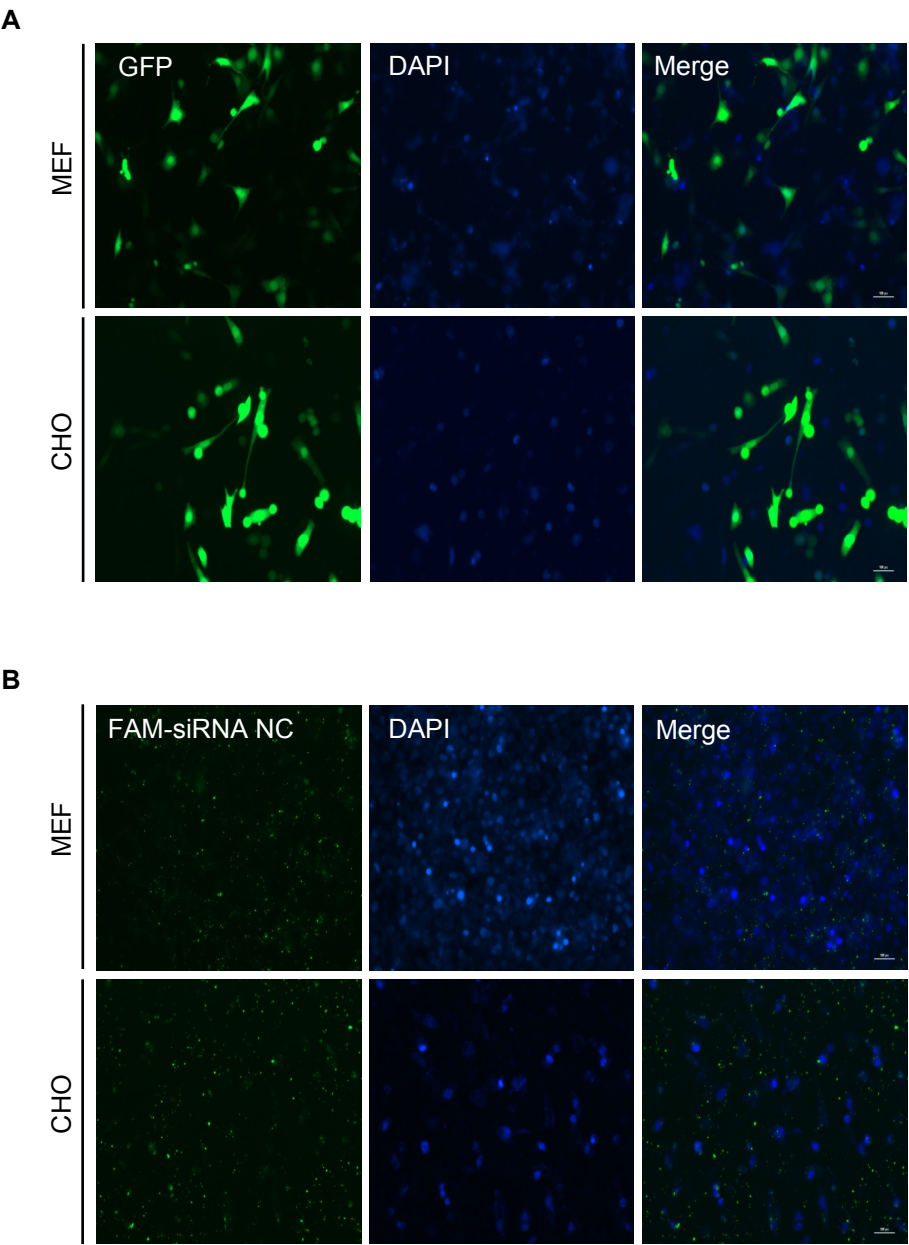

Supplement: f1 [file 2709053.f1.pdf]
